# Supplementary material for: Recruitment of Armitage and Yb to a transcript triggers its phased processing into primary piRNAs in Drosophila ovaries
Source: PubMed Central journal article supplement (PMC5578672; doi:10.1371/journal.pgen.1006956), 2017-08-21
Supplement: pgen.1006956.s006.pdf [file pgen.1006956.s006.pdf]

| #   | sample | expressed reporter | expressed protein | IP   | description                | read counts | after adaptor clipping | reporter piRNAs (24-30nt) | expressed in       |
|-----|--------|--------------------|-------------------|------|----------------------------|-------------|------------------------|---------------------------|--------------------|
| 1   | RR242  | 1347               | none              | PIWI | reporter: Luc-LacZ         | 45400153    | 31755210               | 453                       | OSCs               |
| 2   | RR243  | 1347               | none              | PIWI | reporter: Luc-LacZ         | 49817214    | 34905687               | 271                       | OSCs               |
| 7   | RR248  | 1347               | none              | PIWI | reporter: Luc-LacZ         | 45818946    | 41476378               | 185                       | OSCs               |
| 8   | RR249  | 1347               | none              | PIWI | reporter: Luc-LacZ         | 53235705    | 38526657               | 150                       | OSCs               |
| 3   | RR244  | 1355               | none              | PIWI | reporter: Luc-Flam718-LacZ | 47400545    | 34136474               | 6633                      | OSCs               |
| 4   | RR245  | 1355               | none              | PIWI | reporter: Luc-Flam718-LacZ | 46484415    | 31535069               | 5078                      | OSCs               |
| 5   | RR246  | 1356               | none              | PIWI | reporter: Luc-5BoxB-LacZ   | 41848429    | 28960174               | 1076                      | OSCs               |
| 6   | RR247  | 1356               | none              | PIWI | reporter: Luc-5BoxB-LacZ   | 36707915    | 26165794               | 733                       | OSCs               |
| 9   | RR250  | 1357               | none              | PIWI | reporter: Luc-piRNA1-LacZ  | 50189193    | 37676526               | 64                        | OSCs               |
| 10  | RR251  | 1357               | none              | PIWI | reporter: Luc-piRNA1-LacZ  | 50008169    | 29884732               | 32                        | OSCs               |
| 11  | RR252  | 1358               | none              | PIWI | reporter: Luc-piRNA2-LacZ  | 40555355    | 32489818               | 35                        | OSCs               |
| 12  | RR253  | 1358               | none              | PIWI | reporter: Luc-piRNA2-LacZ  | 42474961    | 31871279               | 46                        | OSCs               |
| 13  | RR259  | 1356               | NHA-Armi          | PIWI | NHA-Armi+reporter          | 51911787    | 36331923               | 6556                      | OSCs               |
| 14  | RR269  | 1356               | NHA-Armi          | PIWI | NHA-Armi+reporter          | 48188326    | 30679254               | 5796                      | OSCs               |
| 15  | RR285  | 1356               | NHA-Armi          | PIWI | NHA-Armi+reporter          | 48866713    | 38296889               | 15543                     | OSCs               |
| 16  | RR310  | 1356               | NHA-Armi          | PIWI | NHA-Armi+reporter          | 18275170    | 12804800               | 3174                      | OSCs               |
| 17  | RR320  | 1356               | NHA-Armi          | PIWI | NHA-Armi+reporter          | 35245580    | 24856197               | 5307                      | OSCs               |
| 18  | RR260  | 1356               | NHA-Armi-GNT      | PIWI | NHA-Armi-GNT+reporter      | 53346763    | 38587783               | 7991                      | OSCs               |
| 19  | RR270  | 1356               | NHA-Armi-GNT      | PIWI | NHA-Armi-GNT+reporter      | 45005773    | 28773416               | 716                       | OSCs               |
| 20  | RR286  | 1356               | NHA-Armi-GNT      | PIWI | NHA-Armi-GNT+reporter      | 46649735    | 37398610               | 2330                      | OSCs               |
| 21  | RR314  | 1356               | NHA-Armi-GNT      | PIWI | NHA-Armi-GNT+reporter      | 22061028    | 14948195               | 567                       | OSCs               |
| 22  | RR324  | 1356               | NHA-Armi-GNT      | PIWI | NHA-Armi-GNT+reporter      | 31514105    | 23179180               | 1597                      | OSCs               |
| 23  | RR315  | 1356               | NHA-ArmiDQ        | PIWI | NHA-ArmiDQ+reporter        | 20256206    | 14329555               | 7940                      | OSCs               |
| 24  | RR325  | 1356               | NHA-ArmiDQ        | PIWI | NHA-ArmiDQ+reporter        | 32931433    | 22228119               | 5346                      | OSCs               |
| 25  | RR311  | 1356               | NHA-ArmiDel1      | PIWI | NHA-ArmiDel1+reporter      | 19060690    | 13628393               | 178                       | OSCs               |
| 26  | RR321  | 1356               | NHA-ArmiDel1      | PIWI | NHA-ArmiDel1+reporter      | 30129621    | 22798882               | 205                       | OSCs               |
| 27  | RR313  | 1356               | NHA-ArmiDel3      | PIWI | NHA-ArmiDel3+reporter      | 20010239    | 15078465               | 388                       | OSCs               |
| 28  | RR323  | 1356               | NHA-ArmiDel3      | PIWI | NHA-ArmiDel3+reporter      | 31450044    | 23754487               | 259                       | OSCs               |
| 29  | RR262  | 1356               | HA-Armi           | PIWI | HA-Armi+reporter           | 51183511    | 37078836               | 261                       | OSCs               |
| 30  | RR283  | 1356               | HA-Armi           | PIWI | HA-Armi+reporter           | 29499430    | 21966788               | 159                       | OSCs               |
| 31  | RR288  | 1356               | HA-Armi           | PIWI | HA-Armi+reporter           | 43286861    | 34280499               | 305                       | OSCs               |
| 32  | RR316  | 1356               | HA-Armi           | PIWI | HA-Armi+reporter           | 18711535    | 13177619               | 120                       | OSCs               |
| 33  | RR326  | 1356               | HA-Armi           | PIWI | HA-Armi+reporter           | 28570361    | 20498247               | 255                       | OSCs               |
| 34  | RR263  | 1356               | NHA-Piwi          | PIWI | NHA-Piwi+reporter          | 51643724    | 39016540               | 1377                      | OSCs               |
| 35  | RR273  | 1356               | NHA-Piwi          | PIWI | NHA-Piwi+reporter          | 44093764    | 29917892               | 342                       | OSCs               |
| 36  | RR289  | 1356               | NHA-Piwi          | PIWI | NHA-Piwi+reporter          | 42616883    | 33588717               | 562                       | OSCs               |
| 37  | RR264  | 1356               | HA-Piwi           | PIWI | HA-Piwi+reporter           | 53534432    | 34098072               | 187                       | OSCs               |
| 38  | RR274  | 1356               | HA-Piwi           | PIWI | HA-Piwi+reporter           | 44851033    | 29739316               | 130                       | OSCs               |
| 39  | RR290  | 1356               | HA-Piwi           | PIWI | HA-Piwi+reporter           | 39945158    | 31223423               | 295                       | OSCs               |
| 40  | RR265  | 1356               | NHA-Yb            | PIWI | NHA-Yb+reporter            | 53579640    | 40067532               | 17309                     | OSCs               |
| 41  | RR275  | 1356               | NHA-Yb            | PIWI | NHA-Yb+reporter            | 54390352    | 36125467               | 2831                      | OSCs               |
| 42  | RR291  | 1356               | NHA-Yb            | PIWI | NHA-Yb+reporter            | 42028244    | 32103252               | 6423                      | OSCs               |
| 43  | RR266  | 1356               | NHA-Yb_D-A        | PIWI | NHA-Yb_D-A+reporter        | 54911076    | 40290173               | 10918                     | OSCs               |
| 44  | RR276  | 1356               | NHA-Yb_D-A        | PIWI | NHA-Yb_D-A+reporter        | 57594057    | 36845719               | 3083                      | OSCs               |
| 45  | RR292  | 1356               | NHA-Yb_D-A        | PIWI | NHA-Yb_D-A+reporter        | 35948297    | 26699976               | 3854                      | OSCs               |
| 46  | RR267  | 1356               | HA-Yb             | PIWI | HA-Yb+reporter             | 52014710    | 37116720               | 333                       | OSCs               |
| 47  | RR277  | 1356               | HA-Yb             | PIWI | HA-Yb+reporter             | 52417239    | 33983102               | 241                       | OSCs               |
| 48  | RR293  | 1356               | HA-Yb             | PIWI | HA-Yb+reporter             | 35712923    | 26694116               | 314                       | OSCs               |
| 49  | RR281  | 1356               | NHA-Shu           | PIWI | NHA-Shu+reporter           | 41971706    | 31046156               | 260                       | OSCs               |
| 50  | RR317  | 1356               | NHA-Shu           | PIWI | NHA-Shu+reporter           | 19306659    | 13651642               | 217                       | OSCs               |
| 51  | RR327  | 1356               | NHA-Shu           | PIWI | NHA-Shu+reporter           | 29532751    | 20063378               | 482                       | OSCs               |
| 52  | RR282  | 1356               | HA-Shu            | PIWI | HA-Shu+reporter            | 43173520    | 31351982               | 168                       | OSCs               |
| 53  | RR318  | 1356               | HA-Shu            | PIWI | HA-Shu+reporter            | 16312244    | 10814972               | 145                       | OSCs               |
| 54  | RR328  | 1356               | HA-Shu            | PIWI | HA-Shu+reporter            | 29734879    | 20962371               | 507                       | OSCs               |
| 55  | RR268  | 1356               | NHA-LacZ          | PIWI | NHA-LacZ+reporter          | 58693901    | 41895222               | 192                       | OSCs               |
| 56  | RR278  | 1356               | NHA-LacZ          | PIWI | NHA-LacZ+reporter          | 53886947    | 36402286               | 209                       | OSCs               |
| 57  | RR284  | 1356               | NHA-LacZ          | PIWI | NHA-LacZ+reporter          | 41346338    | 29271722               | 131                       | OSCs               |
| 58  | RR294  | 1356               | NHA-LacZ          | PIWI | NHA-LacZ+reporter          | 30371094    | 23101548               | 130                       | OSCs               |
| 59  | RR319  | 1356               | NHA-LacZ          | PIWI | NHA-LacZ+reporter          | 15991037    | 11473958               | 87                        | OSCs               |
| 60  | RR329  | 1356               | NHA-LacZ          | PIWI | NHA-LacZ+reporter          | 29540065    | 20991740               | 513                       | OSCs               |
| 61  | RR330  | Uint               | NHA-Armi          | PIWI | NHA-Armi+Uint_reporter     | 34590390    | 27003447               | 4103                      | OSCs               |
| 62  | RR336  | Uint               | NHA-Armi          | PIWI | NHA-Armi+Uint_reporter     | 30164647    | 23330580               | 4098                      | OSCs               |
| 63  | RR342  | Uint               | NHA-Armi          | PIWI | NHA-Armi+Uint_reporter     | 29891764    | 23244606               | 5485                      | OSCs               |
| 64  | RR332  | Uint               | NHA-LacZ          | PIWI | NHA-LacZ+Uint_reporter     | 33557033    | 30506983               | 99                        | OSCs               |
| 65  | RR338  | Uint               | NHA-LacZ          | PIWI | NHA-LacZ+Uint_reporter     | 27527439    | 21591247               | 56                        | OSCs               |
| 66  | RR344  | Uint               | NHA-LacZ          | PIWI | NHA-LacZ+Uint_reporter     | 38698505    | 27981605               | 113                       | OSCs               |
| 67  | RR331  | Uint               | HA-Armi           | PIWI | HA-Armi+Uint_reporter      | 39084540    | 30663303               | 94                        | OSCs               |
| 68  | RR337  | Uint               | HA-Armi           | PIWI | HA-Armi+Uint_reporter      | 29479709    | 23203668               | 65                        | OSCs               |
| 69  | RR343  | Uint               | HA-Armi           | PIWI | HA-Armi+Uint_reporter      | 37766956    | 26375460               | 129                       | OSCs               |
| 70  | RR333  | Uless              | NHA-Armi          | PIWI | NHA-Armi+Uless_reporter    | 35598398    | 27502645               | 5337                      | OSCs               |
| 71  | RR339  | Uless              | NHA-Armi          | PIWI | NHA-Armi+Uless_reporter    | 27235027    | 21622592               | 5993                      | OSCs               |
| 72  | RR345  | Uless              | NHA-Armi          | PIWI | NHA-Armi+Uless_reporter    | 38550295    | 26897936               | 5155                      | OSCs               |
| 73  | RR335  | Uless              | NHA-LacZ          | PIWI | NHA-LacZ+Uless_reporter    | 30309272    | 24631386               | 100                       | OSCs               |
| 74  | RR341  | Uless              | NHA-LacZ          | PIWI | NHA-LacZ+Uless_reporter    | 22275030    | 16638821               | 60                        | OSCs               |
| 75  | RR347  | Uless              | NHA-LacZ          | PIWI | NHA-LacZ+Uless_reporter    | 36526722    | 25096181               | 81                        | OSCs               |
| 76  | RR334  | Uless              | HA-Armi           | PIWI | HA-Armi+Uless_reporter     | 33035863    | 26746046               | 122                       | OSCs               |
| 77  | RR340  | Uless              | HA-Armi           | PIWI | HA-Armi+Uless_reporter     | 24171785    | 21315419               | 311                       | OSCs               |
| 78  | RR346  | Uless              | HA-Armi           | PIWI | HA-Armi+Uless_reporter     | 38578390    | 25700468               | 101                       | OSCs               |
| 79  | RR447  | 1356               | TJ_NHA-Armi-wt    | PIWI | TJ_NHA-Armi-wt+reporter    | 84257836    | 79001629               | 14339                     | fly follicle cells |
| 80  | RR454  | 1356               | TJ_NHA-Armi-wt    | PIWI | TJ_NHA-Armi-wt+reporter    | 43859140    | 42140185               | 8668                      | fly follicle cells |
| 81  | RR448  | 1356               | TJ_NHA-Armi-DQ    | PIWI | TJ_NHA-Armi-DQ+reporter    | 71691234    | 66806477               | 5484                      | fly follicle cells |
| 82  | RR455  | 1356               | TJ_NHA-Armi-DQ    | PIWI | TJ_NHA-Armi-DQ+reporter    | 45151002    | 41863801               | 2687                      | fly follicle cells |
| 83  | RR449  | 1356               | TJ_NHA-Armi-GNT   | PIWI | TJ_NHA-Armi-GNT+reporter   | 58525708    | 55610736               | 2328                      | fly follicle cells |
| 84  | RR456  | 1356               | TJ_NHA-Armi-GNT   | PIWI | TJ_NHA-Armi-GNT+reporter   | 58455675    | 55327818               | 2631                      | fly follicle cells |
| 85  | RR450  | 1356               | TJ_HA-Armi-wt     | PIWI | TJ_HA-Armi-wt+reporter     | 51700617    | 48118450               | 848                       | fly follicle cells |
| 86  | RR457  | 1356               | TJ_HA-Armi-wt     | PIWI | TJ_HA-Armi-wt+reporter     | 53507862    | 49591983               | 875                       | fly follicle cells |
| 87  | RR451  | 1356               | TJ_NHA-Yb-wt      | PIWI | TJ_NHA-Yb-wt+reporter      | 46788042    | 43472364               | 8715                      | fly follicle cells |
| 88  | RR458  | 1356               | TJ_NHA-Yb-wt      | PIWI | TJ_NHA-Yb-wt+reporter      | 54849211    | 50098874               | 10620                     | fly follicle cells |
| 89  | RR452  | 1356               | TJ_NHA-Shu-wt     | PIWI | TJ_NHA-Shu-wt+reporter     | 48641916    | 45984163               | 769                       | fly follicle cells |
| 90  | RR459  | 1356               | TJ_NHA-Shu-wt     | PIWI | TJ_NHA-Shu-wt+reporter     | 53986597    | 50064390               | 891                       | fly follicle cells |
| 91  | RR464  | 1356               | NGT_HA-Armi-wt    | Aub  | NGT_HA-Armi-wt+reporter    | 47387134    | 43999969               | 144                       | fly germ cells     |
| 92  | RR478  | 1356               | NGT_HA-Armi-wt    | Ago3 | NGT_HA-Armi-wt+reporter    | 49288055    | 47333837               | 102                       | fly germ cells     |
| 93  | RR471  | 1356               | NGT_HA-Armi-wt    | PIWI | NGT_HA-Armi-wt+reporter    | 49207459    | 47183695               | 405                       | fly germ cells     |
| 94  | RR462  | 1356               | NGT_NHA-Armi-DQ   | Aub  | NGT_NHA-Armi-DQ+reporter   | 57925546    | 55005522               | 525                       | fly germ cells     |
| 95  | RR476  | 1356               | NGT_NHA-Armi-DQ   | Ago3 | NGT_NHA-Armi-DQ+reporter   | 60041081    | 57287657               | 241                       | fly germ cells     |
| 96  | RR469  | 1356               | NGT_NHA-Armi-DQ   | PIWI | NGT_NHA-Armi-DQ+reporter   | 58427439    | 55230679               | 1407                      | fly germ cells     |
| 97  | RR463  | 1356               | NGT_NHA-Armi-GNT  | Aub  | NGT_NHA-Armi-GNT+reporter  | 50241639    | 47339487               | 160                       | fly germ cells     |
| 98  | RR477  | 1356               | NGT_NHA-Armi-GNT  | Ago3 | NGT_NHA-Armi-GNT+reporter  | 48051625    | 45207328               | 110                       | fly germ cells     |
| 99  | RR470  | 1356               | NGT_NHA-Armi-GNT  | PIWI | NGT_NHA-Armi-GNT+reporter  | 54839240    | 51901317               | 311                       | fly germ cells     |
| 100 | RR461  | 1356               | NGT_NHA-Armi-wt   | Aub  | NGT_NHA-Armi-wt+reporter   | 48648491    | 44407245               | 352                       | fly germ cells     |
| 101 | RR475  | 1356               | NGT_NHA-Armi-wt   | Ago3 | NGT_NHA-Armi-wt+reporter   | 44187186    | 41623558               | 128                       | fly germ cells     |
| 102 | RR468  | 1356               | NGT_NHA-Armi-wt   | PIWI | NGT_NHA-Armi-wt+reporter   | 52578477    | 49875043               | 1054                      | fly germ cells     |
| 103 | RR467  | 1356               | NGT_NHA-Shu-wt    | Aub  | NGT_NHA-Shu-wt+reporter    | 53679402    | 50896046               | 394                       | fly germ cells     |
| 104 | RR481  | 1356               | NGT_NHA-Shu-wt    | Ago3 | NGT_NHA-Shu-wt+reporter    | 54426086    | 51785950               | 360                       | fly germ cells     |
| 105 | RR474  | 1356               | NGT_NHA-Shu-wt    | PIWI | NGT_NHA-Shu-wt+reporter    | 53365614    | 50911597               | 642                       | fly germ cells     |
| 106 | RR465  | 1356               | NGT_NHA-Vret-wt   | Aub  | NGT_NHA-Vret-wt+reporter   | 49394959    | 46613180               | 71                        | fly germ cells     |
| 107 | RR479  | 1356               | NGT_NHA-Vret-wt   | Ago3 | NGT_NHA-Vret-wt+reporter   | 50916916    | 49021631               | 31                        | fly germ cells     |
| 108 | RR472  | 1356               | NGT_NHA-Vret-wt   | PIWI | NGT_NHA-Vret-wt+reporter   | 58998144    | 55460665               | 114                       | fly germ cells     |
| 109 | RR466  | 1356               | NGT_NHA-Yb-wt     | Aub  | NGT_NHA-Yb-wt+reporter     | 50258500    | 47941737               | 79                        | fly germ cells     |
| 110 | RR480  | 1356               | NGT_NHA-Yb-wt     | Ago3 | NGT_NHA-Yb-wt+reporter     | 54395925    | 51518687               | 30                        | fly germ cells     |
| 111 | RR473  | 1356               | NGT_NHA-Yb-wt     | PIWI | NGT_NHA-Yb-wt+reporter     | 47742276    | 44476638               | 257                       | fly germ cells     |

Reporter constructs used:

|       |                                           |
|-------|-------------------------------------------|
| 1347  | Luc-LacZ                                  |
| 1355  | Luc-Flam718-LacZ                          |
| 1357  | Luc-piRNA1-LacZ                           |
| 1358  | Luc-piRNA2-LacZ                           |
| 1356  | Luc-5BoxB-LacZ                            |
| Uless | Luc-5BoxB-LacZ with U-depleted regions    |
| Uint  | Luc-5BoxB-LacZ with Us at specific places |
